# Supplementary material for: The Use of Oral Anticoagulation Is Not Independently Associated with Mortality in Frail Older Patients with Repeated Falls
Source: MDPI journal article supplement (doi:10.3390/jcm12237388), 2023-11-29
Supplement: s1 [file s1]

## **Supplementary Table S1.** Factors in the Frailty Index.

Mild Cognitive Impairment  
Dementia  
Syncope  
Heart Failure  
Ischemic Heart Disease  
Peripheral arterial disease  
Stroke  
Multiple Stroke  
Diabetes Mellitus  
Liver cirrhosis  
Hypertension  
Anaemia  
Renal Impairment, class 2 or up  
Electrolyte abnormality  
Hypothyroidism  
Hyperthyroidism  
Malignancy  
Epilepsy  
Schizophrenia  
Morbus Parkinson or parkinsonism of other causes  
Gait disorder  
Visual Impairment  
Auditory Impairment  
Osteoporosis  
Arthrosis  
Chronic Obstructive Pulmonary Disease  
Asthma  
Obstructive Sleep Apnoea Syndrome  
Mood disorder  
Anxiety disorder  
Falls  
Obesity  
Underweight  
Gout  
Polyneuropathy  
Polypharmacy  
MMSE below 26 points  
MoCA below 26 points  
MNA lower than 12 points  
ADL dependent  
iADL dependent  
Social status (living alone)

Explanatory note: All factors are assigned an equal weight if present in the patient. The index is calculated as the sum of factors, divided by 42. Polypharmacy is defined as using 6 or more different drugs.

Abbreviations. MMSE: Mini Mental State Examination, MoCA: Montreal Cognitive Assessment, MNA: Mini Nutritional Assessment, ADL: Activities of Daily Living, iADL: instrumental Activities of Daily Living.

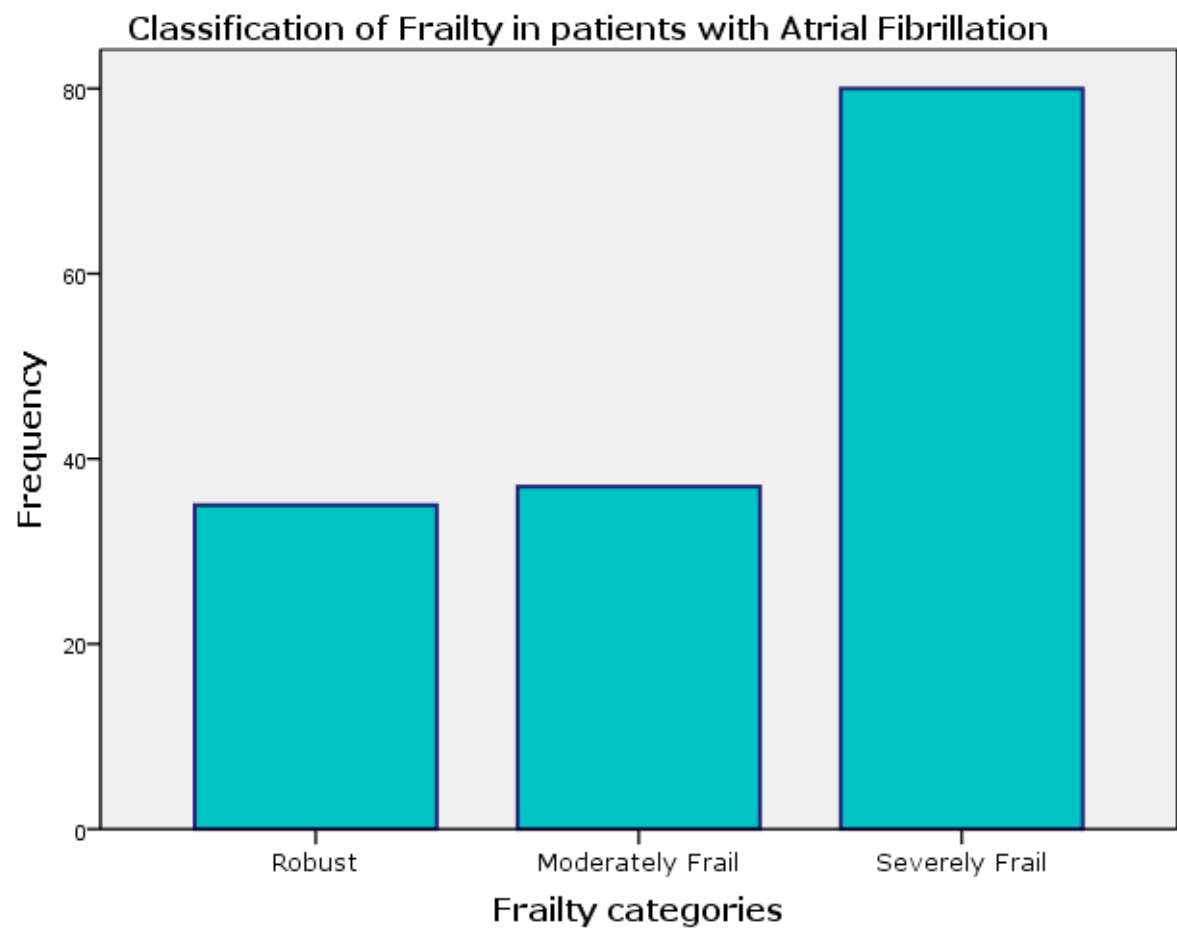

**Supplementary Figure S1.** Classification of Frailty in patients with Atrial Fibrillation.
